# Supplementary material for: Prevalence of hepatitis D virus infection in sub-Saharan Africa: a systematic review and meta-analysis
Source: PubMed Central journal article supplement (PMC5599428; doi:10.1016/s2214-109x(17)30298-x), 2017-09-11

# THE LANCET

## Global Health

### Supplementary appendix

This appendix formed part of the original submission and has been peer reviewed.  
We post it as supplied by the authors.

Supplement to: Stockdale AJ, Chaponda M, Beloukas A, et al. Prevalence of hepatitis D virus infection in sub-Saharan Africa: a systematic review and meta-analysis. *Lancet Glob Health* 2017; 5: e992–1003.

## SUPPLEMENTARY MATERIAL

### Supplementary Table 1: Search strings performed using Pubmed, Embase and Scopus

Limits: publication date 1 Jan 1995- 1 June 2016

No language restriction

|    |                                                                                                                                                                                                                                                                                                                                                                                                                                                                                                                                                                                                                                                                                                                                                                                                                                                                                                                                                                                                                                                                                           |
|----|-------------------------------------------------------------------------------------------------------------------------------------------------------------------------------------------------------------------------------------------------------------------------------------------------------------------------------------------------------------------------------------------------------------------------------------------------------------------------------------------------------------------------------------------------------------------------------------------------------------------------------------------------------------------------------------------------------------------------------------------------------------------------------------------------------------------------------------------------------------------------------------------------------------------------------------------------------------------------------------------------------------------------------------------------------------------------------------------|
| #1 | Hepatitis D[MeSH] OR Hepatitis Delta Virus [MeSH] or Hepatitis delta Antigens [MeSH] or "hepatitis D virus" OR "hepatitis d" or "hepatitis delta" OR hepatitis delta antigen* OR "hepatitis delta virus" or "HDV" or "delta virus"                                                                                                                                                                                                                                                                                                                                                                                                                                                                                                                                                                                                                                                                                                                                                                                                                                                        |
| #2 | Search Africa[MeSH] OR africa[tiab] OR "sub Saharan africa"[tiab] OR "sub-Saharan Africa"[tiab] OR Angola[tiab] OR Benin[tiab] OR Botswana[tiab] OR "Burkina Faso"[tiab] OR Burundi[tiab] OR Cameroon[tiab] OR "Cape Verde"[tiab] OR "Central African Republic"[tiab] OR Chad[tiab] OR Comoros[tiab] OR "Republic of the Congo"[tiab] OR "Democratic Republic of the Congo"[tiab] OR "Cote d'Ivoire"[tiab] OR Djibouti[tiab] OR "Equatorial Guinea"[tiab] OR Eritrea[tiab] OR Ethiopia[tiab] OR Gabon[tiab] OR "The Gambia"[tiab] OR Ghana[tiab] OR Guinea[tiab] OR "Guinea-Bissau"[tiab] OR Kenya[tiab] OR Lesotho[tiab] OR Liberia[tiab] OR Madagascar[tiab] OR Malawi[tiab] OR Mali[tiab] OR Mauritania[tiab] OR Mauritius[tiab] OR Mozambique[tiab] OR Namibia[tiab] OR Niger[tiab] OR Nigeria[tiab] OR Rwanda[tiab] OR "Sao Tome and Principe"[tiab] OR Senegal[tiab] OR Seychelles[tiab] OR "Sierra Leone"[tiab] OR "South Africa"[tiab] OR "South Sudan"[tiab] OR Sudan[tiab] OR Swaziland[tiab] OR Tanzania[tiab] OR Togo[tiab] OR Uganda[tiab] OR Zambia[tiab] OR Zimbabwe[tiab] |
| #3 | #1 AND #2                                                                                                                                                                                                                                                                                                                                                                                                                                                                                                                                                                                                                                                                                                                                                                                                                                                                                                                                                                                                                                                                                 |

\*For Embase, the thesaurus tool was used to map to subject headings.

Abbreviations: [MeSH]= Medical subject heading (for MEDLINE searches), [TIAB]=Title, abstract

**Supplementary Table 2. Prevalence of hepatitis B virus (HBV) and hepatitis D virus (HDV) co-infection in adults attending for routine HIV care in Kumasi, Ghana and Blantyre, Malawi**

|                                                   | Kumasi,<br>Ghana | Blantyre<br>Malawi |
|---------------------------------------------------|------------------|--------------------|
| Year of sampling                                  | 2010-2013        | 2007-2009          |
| Tested for HBsAg, n                               | 1643             | 1117               |
| HBsAg positive, n (%)                             | 230 (14.0)       | 133 (11.9)         |
| Female, n (%)                                     | 152 (66.1)       | 67 (50.4)          |
| Age, median years (IQR)                           | 39 (33, 46)      | 36 (31, 42)        |
| HIV-1 RNA, median log <sub>10</sub> cps/ml (IQR)* | UD (UD, 3.8)     | 4.0 (3.5, 4.7)     |
| CD4 count, median cells/mm <sup>3</sup> (IQR)     | 476 (283, 638)   | 109 (53, 192)      |
| Tested for anti-HDV, n (%)                        | 222 (96.5)       | 133 (100)          |
| Anti-HDV positive, n (%)                          | 5 (2.2)          | 2 (1.5)            |
| HDV RNA positive, n (%) <sup>b</sup>              | 2 (0.9)          | 0 (0)              |

\*A total of 185/230 (80.4%) HBsAg-positive patients in Kumasi were established on antiretroviral therapy; all patients from Malawi were treatment-naïve at the time of sampling; <sup>b</sup>HDV RNA was detected in two of the seven anti-HDV positive samples, with a mean HDV RNA load from two experiments of 6.0 and 5.0 log<sub>10</sub> IU/ml (inter-assay coefficient of variation 0.1% and 0.5%, respectively). Abbreviations: HBsAg, hepatitis B surface antigen; IQR, interquartile range; UD, undetectable (<40 copies/ml).

**Supplementary Table 3: Method of enzyme immunoassay for total anti-HDV antibody used in included studies**

| Country                          | Ref | Year    | Population                                 | Method and manufacturer                                                  |
|----------------------------------|-----|---------|--------------------------------------------|--------------------------------------------------------------------------|
| <b>General Populations</b>       |     |         |                                            |                                                                          |
| Benin                            | 21  | 2011    | Pregnant women †                           | ETI-AB-DELTAK-2 (anti-HD), Diasorin, Saluggia, Italy                     |
| Burkina Faso                     | 31  | 2015    | Blood donors                               | ETI-AB-DELTAK-2 (anti-HD), Diasorin                                      |
| Burkina Faso                     | 18  | 2001    | Mothers                                    | ETI-AB-DELTAK-2 (anti-HD), Diasorin or Murex Anti-Delta, Abbott, IL, USA |
| The Gambia                       | 34  | 2013    | Community                                  | ETI-AB-DELTAK-2 (anti-HD), Diasorin                                      |
| The Gambia                       | 34  | 2013    | Blood donors                               | ETI-AB-DELTAK-2 (anti-HD), Diasorin                                      |
| Ghana                            | 33  | 2015    | Community †                                | ETI-AB-DELTAK-2 (anti-HD), Diasorin                                      |
| Ghana                            | S+  | 2010    | HIV clinic                                 | HDV Ab, Dia.Pro, Milan, Italy                                            |
| Guinea-Bissau                    | 23  | 2011    | HIV clinic                                 | ETI-AB-DELTAK-2 (anti-HD), Diasorin                                      |
| Mauritania                       | 25  | 2008    | Blood donors                               | ETI-AB-DELTAK-2 (anti-HD), Diasorin                                      |
| Mauritania                       | 26  | 2008-9  | Pregnant women                             | ETI-AB-DELTAK-2 (anti-HD), Diasorin                                      |
| Mauritania                       | 26  | 2008-9  | Medical outpatients ‡                      | ETI-AB-DELTAK-2 (anti-HD), Diasorin                                      |
| Nigeria                          | 32  | 2014    | Medical outpatients ‡                      | ETI-AB-DELTAK-2 (anti-HD), Diasorin                                      |
| Nigeria                          | 18  | 2004    | HIV clinic                                 | ETI-AB-DELTAK-2 (anti-HD), Diasorin or Murex Anti-Delta, Abbott          |
| Nigeria                          | 18  | 1998    | HIV clinic                                 | ETI-AB-DELTAK-2 (anti-HD), Diasorin or Murex Anti-Delta, Abbott          |
| Senegal                          | 30  | 2003    | Blood donors                               |                                                                          |
| Senegal                          | 22  | 1998-02 | HIV clinic                                 | Murex Anti-Delta, Abbott                                                 |
| Cameroon                         | 42  | 2011    | National survey                            | Not stated                                                               |
| Cameroon                         | 36  | 2011    | Health care workers †                      | Not stated                                                               |
| Cameroon                         | 41  | 2010    | HIV clinic                                 | Anti-HDV, Radim Alisei, Pomezia, Italy                                   |
| Cameroon                         | 37  | 2007    | Pregnant women †                           | ETI-AB-DELTAK-2 (anti-HD), Diasorin                                      |
| Gabon                            | 64  | 2015    | Community†§                                | Murex Anti-Delta, Abbott,                                                |
| Gabon                            | 39  | 2005    | Pregnant women                             | Murex Anti-Delta, Abbott,                                                |
| Gabon                            | 40  | 2008    | Community †§                               | Murex Anti-Delta, Abbott,                                                |
| Botswana                         | 45  | 2006-8  | Pregnant women                             | HDV Ab, Dia.Pro                                                          |
| Malawi                           | S+  | 2007-9  | HIV clinic                                 | HDV Ab, Dia.Pro                                                          |
| Mozambique                       | 44  | 2007    | Blood donors                               | ETI-AB-DELTAK-2 (anti-HD), Diasorin                                      |
| South Africa                     | 19  | 2008    | Pregnant women                             | ETI-AB-DELTAK-2 (anti-HD), Diasorin                                      |
| South Africa                     | 45  | 2008    | HIV+ pregnant or postnatal women           | HDV Ab, Dia.Pro                                                          |
| South Africa                     | 45  | 2004-10 | Pregnant women                             | HDV Ab, Dia.Pro                                                          |
| Tanzania                         | 46  | 2013-14 | HIV clinic†                                | ETI-AB-DELTAK-2 (anti-HD), Diasorin                                      |
| <b>Liver disease populations</b> |     |         |                                            |                                                                          |
|                                  |     |         | <b>Liver disease populations</b>           |                                                                          |
| Ghana                            | 20  | 2014    | Hepatology clinic                          | Anti-HDV, Globe Diagnostics, Milan, Italy                                |
| Mauritania                       | 24  | 2009    | Hepatology clinic                          | ETI-AB-DELTAK-2 (anti-HD), Diasorin                                      |
| Nigeria                          | 28  | 2012    | Patients with HCC                          | Not stated                                                               |
| Nigeria                          | 29  | 2009-10 | Hepatology clinic (15% cirrhosis, 3% HCC)  | HDV Ab, Dia.Pro                                                          |
| Nigeria                          | 49  | 2006    | Hepatology clinic (22% cirrhosis, 51% HCC) | ETI-AB-DELTAK-2 (anti-HD), Diasorin                                      |
| Nigeria                          | 18  | 2006    | Hepatology clinic                          | ETI-AB-DELTAK-2 (anti-HD), Diasorin or Murex Anti-Delta, Abbott          |
| Nigeria                          | 18  | 2003    | Hepatology clinic                          | ETI-AB-DELTAK-2 (anti-HD), Diasorin or Murex Anti-Delta, Abbott          |
| Senegal                          | 30  | 2003    | Hepatology clinic                          |                                                                          |
| Senegal                          | 27  | 1995    | Hepatology clinic (39% cirrhosis, 57% HCC) | Anti-Delta, Sanofi Pasteur, Lyon, France                                 |
| Cameroon                         | 38  | 2008-9  | Hepatology clinic                          | Murex Anti-Delta, Abbott                                                 |
| CAR                              | 18  | 2009    | Hepatology clinic                          | ETI-AB-DELTAK-2 (anti-HD), Diasorin                                      |
| CAR                              | 35  | 2006-9  | Patients with HCC                          | Not stated                                                               |

**Supplementary table 4: Distribution of HDV genotypes in sub-Saharan Africa**

| Study                           | Year   | Genbank/ ENA reference | Country    | Sequences | Genotype | Frequency, n(%) |
|---------------------------------|--------|------------------------|------------|-----------|----------|-----------------|
| Andernach <sup>18</sup>         | 2004-6 | JX888098-<br>JX888135  | Nigeria    | 15        | 1        | 8 (53)          |
|                                 |        |                        |            |           | 5        | 5 (33)          |
|                                 |        |                        |            |           | 6        | 2 (13)          |
| Andernach <sup>18</sup>         | 2009   |                        | CAR        | 6         | 1        | 6 (100)         |
| Andernach <sup>18</sup>         | 2007   |                        | Chad       | 3         | 1        | 3 (100)         |
| Mansour <sup>25</sup>           | 2008-9 | -                      | Mauritania | 28        | 1        | 25 (89)         |
|                                 |        |                        |            |           | 5        | 3 (11)          |
| Mansour <sup>26</sup>           | 2008-9 | -                      | Mauritania | 31        | 1        | 28 (90)         |
|                                 |        |                        |            |           | 5        | 3 (10)          |
| Lunel-Fabiani <sup>24</sup>     | 2009   | -                      | Mauritania | 47        | 1        | 40 (85)         |
|                                 |        |                        |            |           | 5        | 7 (15)          |
| Foupouapouognigni <sup>38</sup> | 2008-9 | HQ013330-<br>HQ013354  | Cameroon   | 25        | 1        | 22 (88)         |
|                                 |        |                        |            |           | 5        | 1 (4)           |
|                                 |        |                        |            |           | 6        | 1 (4)           |
|                                 |        |                        |            |           | 7        | 1 (4)           |
| Makuwa <sup>40</sup>            | 2005   | FJ349279 -<br>FJ349295 | Gabon      | 17        | 1        | 10 (59)         |
|                                 |        |                        |            |           | 7        | 2 (12)          |
|                                 |        |                        |            |           | 8        | 5 (29)          |
| Makuwa <sup>39</sup>            | 2005   | EU035518 -<br>EU035520 | Gabon      | 3         | 1        | 1 (33)          |
|                                 |        |                        |            |           | 8        | 2 (67)          |
| This study                      | 2015   | KU307191 -<br>KU307192 | Ghana      | 2         | 1        | 1 (50)          |
|                                 |        |                        |            |           | 5        | 1 (50)          |
| Opaleye <sup>50</sup>           | 2016   | KU844264 -<br>KU844277 | Nigeria    | 14        | 1        | 14 (100)        |
| Makiala-Mandanda <sup>65</sup>  | 2017   | LT703299-<br>LT703311  | DR Congo   | 12        | 1        | 12 (100)        |

<sup>a</sup>Nucleotide positions (nt) are relative to NCBI reference sequence NC\_001653.2 – the HDV antigen coding sequence is located at nucleotide positions 1013-1600. Data are from included studies that reported genotypic data and from data published in publicly available sequence databases (GenBank and European Nucleotide Archive, available at <https://www.ncbi.nlm.nih.gov/genbank/> and <http://www.ebi.ac.uk/ena> respectively).

## Supplementary Material: HDV RNA detection and sequencing in Ghana and Malawi

### Methodology

Plasma samples (250µl) underwent nucleic acid extraction by the Nuclisens easyMAG platform (Biomerieux, Marcy l'Etoile, France) using a modified version of the off-board lysis protocol (B protocol) and 40ul elution volume. The extract (10µl in 25µl final reaction volume) underwent single-step reverse transcription and amplification on the ABI 7500 real-time PCR instrument using the AgPath-ID One-Step kit (Applied Biosystems, Paisley, UK). Primers, probes and PCR conditions were previously published.<sup>66</sup> To produce a quantification standard, a synthetic HDV cDNA plasmid was prepared covering a 53 nucleotide sequence located upstream of the large-HDAg open reading frame. The HDV plasmid was calibrated in triplicate serial dilutions run alongside duplicate serial dilutions of the 1<sup>st</sup> World Health Organisation (WHO) International Standard for HDV RNA (NIBSC, Paul-Ehrlich-Institute code 7657/12). The assay lower limit of quantification was determined as 144 IU/mL. A HDV RNA positive plasma sample (6.7 log<sub>10</sub> IU/mL) was included as a positive control in each set of experiments; with this sample, the inter-assay coefficient of variation (CV) from eight independent experiments was 0.2%.

HDV RNA positive samples underwent Sanger sequencing of a 257-base pair region of large-HDAg open reading frame. Nucleic acid extracts were reverse transcribed by the SuperScript® III One-Step RT-PCR System with Platinum® Taq DNA Polymerase (Invitrogen, MA, USA) under the following thermal cycling conditions: 55 °C for 30 min, 94 °C for 2 min, and then 40 cycles at 94 °C for 15 s, 50 °C for 30 s, 68 °C for 1 min and 68 °C for 5 min. This was followed by nested amplification using Platinum® PCR SuperMix High Fidelity (Invitrogen, CA, USA) under the following conditions: 94 °C for 2 min, and then 35 cycles of 94 °C for 30 s, 54 °C for 30 s, 68 °C for 1 min and 68 °C for 10 min. Nested PCR products were visualised on a 2% agarose gel, purified using the QIAquick PCR purification kit (Qiagen, Hilden, Germany), and sequenced using BigDye Terminator Cycle Sequencing Kit v3.1 on the ABI Prism 3730 Genetic Analyser (Applied Biosystems). Raw sequences were edited using SeqScape version 2.7 (Applied Biosystems), aligned using the ClustalW as implemented in MEGA v.6.0, and manually edited. HDV genotypes were identified phylogenetically using 67 reference sequences of known genotype derived from the NCBI Genbank Database ([www.ncbi.nlm.nih.gov/genbank](http://www.ncbi.nlm.nih.gov/genbank)). Phylogenetic analysis was performed based on Bayesian Markov Chain Monte-Carlo (MCMC) phylogenetic inference, as implemented in BEAST v1.8.1 for 10<sup>7</sup> generations, and tree visualization and annotation was performed using FigTree v1.4. Sequences obtained in this study were submitted to NCBI GenBank (accession numbers KU307191-KU307192).

### Results

Within our previous studies<sup>47,48</sup>, 1643 Ghanaian and 1117 Malawian HIV positive adults were tested for HBsAg (Supplementary Table 2). HBsAg prevalence was 14.0% (95% CI 12.4-15.8) in Ghana and 11.9% (95% CI 10.1-13.9) in Malawi. HDV seroprevalence among HBsAg positive patients was 5/222 (2.2%; 95% CI 0.8-5.3) in Ghana and 2/133 (1.5%; 95% CI 0.1-5.7) in Malawi. HDV RNA was detected in 2/5 and 0/2 anti-HDV positive patients, yielding a HDV RNA prevalence among HBsAg carriers of 0.9% (95% CI 0.03-3.4) and 0% (95% CI 0-3.4), respectively. The two HDV strains from Ghana were genotyped as 1 and 5 (Supplementary Figure 1).

Supplementary Figure 1. Phylogenetic analysis of two HDV strains from Ghana alongside reference sequences of known HDV genotype. One HDV strain clustered within HDV genotype 5 sequences (in red), whereas the second was closely related to HDV genotype 1 sequences (in blue). Nodes with posterior probability equal to 1.0 are indicated with an asterisk.

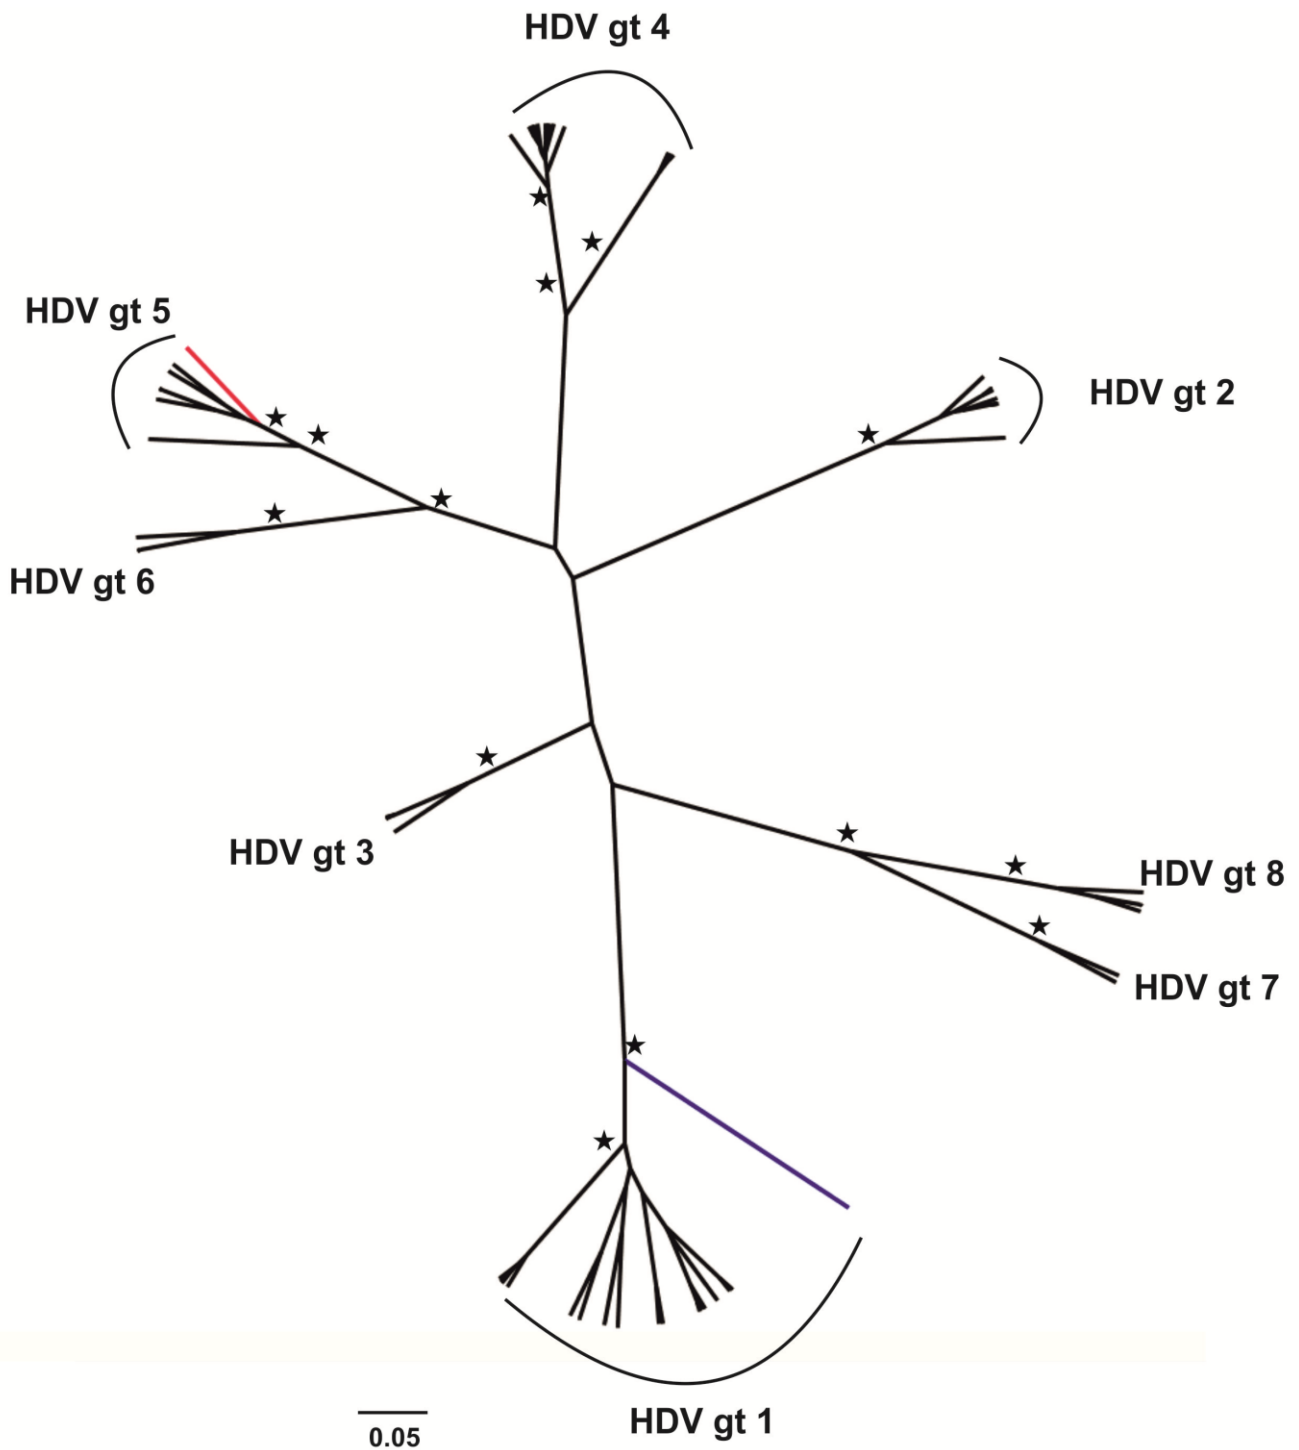

Supplementary Figure 2. Funnel plot of included studies

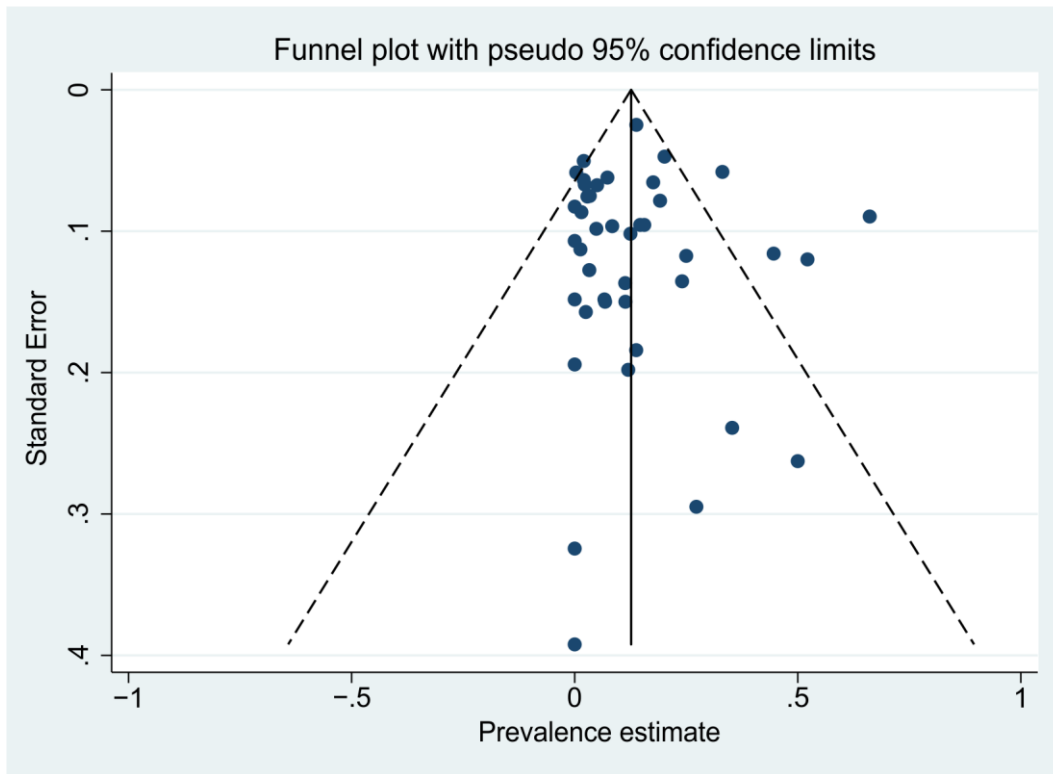

Supplement: mmc1.pdf [file mmc1.pdf]
